# Supplementary material for: Morphological and molecular diversity of Lake Baikal candonid ostracods, with description of a new genus
Source: Zookeys. 2017 Jul 11;(684):19–56. doi: 10.3897/zookeys.684.13249 (PMC5523182; doi:10.3897/zookeys.684.13249)
Supplement: Supplementary material 2 — p-distances between 18S rRNA sequences [file zookeys-684-019-s002.xls]

## Sheet: MatrixOutput
Baicalocandona rupestris
Baicalocandona sp.	0.004561
Pseudocandona sp. 6	0.0200669	0.0227531
Candona candida	0.0231788	0.0216648	0.0345212
Candona candida 1	0.0231278	0.0216155	0.0344444	0.001001
Candona bimucronata	0.0319735	0.0307517	0.0411568	0.00907258	0.00905433
Candona neglecta	0.0365449	0.0364465	0.0467186	0.0163221	0.0162866	0.00977199
Mazepovacandona navitarum	0.0287611	0.0273038	0.0411111	0.04772	0.047619	0.0550847	0.0423913
Mazepovacandona spicata	0.0264317	0.0250284	0.0388889	0.0239085	0.0241597	0.0317125	0.0349727	0.0087241
Mazepovacandona godlewsi	0.0242291	0.022805	0.0356745	0.0117146	0.012766	0.0203426	0.0254707	0.00883978	0.00849257
Mazepovacandona orbiculata	0.0209482	0.0193182	0.0355556	0.0625641	0.0558428	0.0632124	0.0358696	0.00951374	0.00978261	0.00330396
Mazepovacandona directa	0.0242291	0.022805	0.0379041	0.0121413	0.0121145	0.0209482	0.0254707	0.00883978	0.00660066	0.00220022	0.00330396
Mazepovacandona sp.	0.0242291	0.0227531	0.0377778	0.015873	0.0158395	0.0243902	0.0296053	0.00875274	0.00632911	0.00212993	0.00327154	0

## Sheet: Caption
Table. Estimates of Evolutionary Divergence between Sequences
The number of base differences per site from between sequences are shown. The analysis involved 13 nucleotide sequences. All ambiguous positions were removed for each sequence pair. There were a total of 1032 positions in the final dataset. Evolutionary analyses were conducted in MEGA7 [1].
1. Kumar S., Stecher G., and Tamura K. (2016). MEGA7: Molecular Evolutionary Genetics Analysis version 7.0 for bigger datasets.Molecular Biology and Evolution 33:1870-1874.
Disclaimer: Although utmost care has been taken to ensure the correctness of the caption, the caption text is provided "as is" without any warranty of any kind. Authors advise the user to carefully check the caption prior to its use for any purpose and report any errors or problems to the authors immediately (www.megasoftware.net). In no event shall the authors and their employers be liable for a…
