# Supplementary material for: Morphological and molecular diversity of Lake Baikal candonid ostracods, with description of a new genus
Source: Zookeys. 2017 Jul 11;(684):19–56. doi: 10.3897/zookeys.684.13249 (PMC5523182; doi:10.3897/zookeys.684.13249)
Supplement: Supplementary material 3 — p-distances between 28S rRNA sequences, df region [file zookeys-684-019-s003.xls]

## Sheet: MatrixOutput
Mazepovacndona orbiculata
Pseudocandona sp. 1	0.0151007
Pseudocandona sp. 6	0.0203735	0.00504202
Candona candida 1	0.0201342	0.00837521	0.0135593
Candona candida	0.0201681	0.00998336	0.0151515	0.00149477
Candona neglecta	0.0419463	0.0282392	0.033557	0.0291734	0.0305958
Mazepovacandona navitarum	0.00785855	0.0137795	0.0177165	0.0216535	0.0216963	0.0374016
Mazepovacandona directa	0.00479616	0.0118483	0.0162413	0.0167866	0.0190024	0.0401891	0.00526316
Mazepovacandona godlewski 1	0.00687285	0.010327	0.0156794	0.0187075	0.0187394	0.037415	0.00392927	0.00497512
Mazepovacandona godlewski	0.00670017	0.00998336	0.0151515	0.0226171	0.0241158	0.037037	0.00392927	0.00473934	0
Baicalocandona rupestirs	0.0133333	0.00266667	0.008	0.0106667	0.0106952	0.0186667	0.0133333	0.0117188	0.0106667	0.0106667
Mazepovacanona spicata	0.00502513	0.0134228	0.0186757	0.0180328	0.0180624	0.0393443	0.00589391	0.00239808	0.00509338	0.00490998	0.0133333
Mazepovacandona sp.	0.0040568	0.0140562	0.0199203	0.0182556	0.0201207	0.0380762	0.00438596	0	0.0041841	0.00401606	0.0150602	0.0020284

## Sheet: Caption
Table. Estimates of Evolutionary Divergence between Sequences
The number of base differences per site from between sequences are shown. The analysis involved 13 nucleotide sequences. All ambiguous positions were removed for each sequence pair. There were a total of 713 positions in the final dataset. Evolutionary analyses were conducted in MEGA7 [1].
1. Kumar S., Stecher G., and Tamura K. (2016). MEGA7: Molecular Evolutionary Genetics Analysis version 7.0 for bigger datasets.Molecular Biology and Evolution 33:1870-1874.
Disclaimer: Although utmost care has been taken to ensure the correctness of the caption, the caption text is provided "as is" without any warranty of any kind. Authors advise the user to carefully check the caption prior to its use for any purpose and report any errors or problems to the authors immediately (www.megasoftware.net). In no event shall the authors and their employers be liable for a…
