# Supplementary material for: Morphological and molecular diversity of Lake Baikal candonid ostracods, with description of a new genus
Source: Zookeys. 2017 Jul 11;(684):19–56. doi: 10.3897/zookeys.684.13249 (PMC5523182; doi:10.3897/zookeys.684.13249)
Supplement: Supplementary material 6 — p-distances between 16S rRNA sequences [file zookeys-684-019-s006.xls]

## Sheet: MatrixOutput
Pseudocandona sp. 1
Candona bimucronata	0.166667
Candona candida 1	0.166667	0.0796813
Candona neglecta	0.161491	0.0729614	0.0835118
Mazepovacanodna navitarum	0.135802	0.108401	0.145553	0.108262
Mazepovacandona directa	0.116564	0.104082	0.105691	0.101322	0.0725806
Mazepovacandona godlewski	0.150943	0.0807087	0.104628	0.0849673	0.0677507	0.0532787
Mazepovacandona orbiculata	0.130435	0.0883621	0.101512	0.0847059	0.0539084	0.0408602	0.0451613
Mazepovacandona spicata	0.122699	0.0965795	0.104	0.108225	0.0672043	0.0506073	0.0585859	0.0451613
Mazepovacandona sp.	0.110429	0.113924	0.108333	0.10084	0.0504202	0.00414938	0.0468085	0.0295359	0.0373444

## Sheet: Caption
Table. Estimates of Evolutionary Divergence between Sequences
The number of base differences per site from between sequences are shown. The analysis involved 10 nucleotide sequences. All ambiguous positions were removed for each sequence pair. There were a total of 526 positions in the final dataset. Evolutionary analyses were conducted in MEGA7 [1].
1. Kumar S., Stecher G., and Tamura K. (2016). MEGA7: Molecular Evolutionary Genetics Analysis version 7.0 for bigger datasets.Molecular Biology and Evolution 33:1870-1874.
Disclaimer: Although utmost care has been taken to ensure the correctness of the caption, the caption text is provided "as is" without any warranty of any kind. Authors advise the user to carefully check the caption prior to its use for any purpose and report any errors or problems to the authors immediately (www.megasoftware.net). In no event shall the authors and their employers be liable for a…
